# Supplementary material
Source: PubMed Central journal article supplement (PMC2859911)
Supplement: mcq035_1.pdf [file mcq035_1.pdf]

## SUPPLEMENTARY DATA

List of localities with geographical co-ordinates. DNA-ploidy level of plants was assessed using flow-cytometry. The presence of respective ploidy level within a population is marked by **x**. Ploidy level records labelled with asterisks were also determined by direct counting from mitotic cells.

| Nr. | DNA-ploidy level |       |       | Town/village         | Description of the locality                                                                       | Geographical coordinates (degrees, minutes, seconds) |    |    |               |    |   | Altitude (m) |
|-----|------------------|-------|-------|----------------------|---------------------------------------------------------------------------------------------------|------------------------------------------------------|----|----|---------------|----|---|--------------|
|     | 2n-4x            | 2n-5x | 2n-6x |                      |                                                                                                   | Latitude (N)                                         |    |    | Longitude (E) |    |   |              |
| 1   |                  |       | x     | Drahanovice -Luděřov | NW outskirts of the village, broad-leaved dry grasslands                                          | 49                                                   | 34 | 49 | 17            | 25 | 3 | 340          |
| 2   |                  | x     | x     | Drahanovice -Luděřov | N outskirts of the village, secondary <i>Robinia pseudacacia</i> plantation                       | 49                                                   | 34 | 49 | 17            | 41 | 4 | 340          |
| 3   |                  | x     |       | Drahanovice -Luděřov | N outskirts of the village, mesic scrub close to the road-side                                    | 49                                                   | 34 | 49 | 17            | 42 | 4 | 340          |
| 4   |                  | x*    | x     | Jevíčko              | mesic <i>Arrhenatherum</i> meadow                                                                 | 49                                                   | 38 | 31 | 46            | 45 | 1 | 399          |
| 5   |                  | x*    | x     | Jevíčko              | mesic scrub above the railway-station                                                             | 49                                                   | 38 | 16 | 44            | 3  | 1 | 399          |
| 6   |                  |       | x     | Malá Roudka          | SW margin of the village, sliding chalk slopes above the road, oak-hornbeam forest                | 49                                                   | 38 | 16 | 38            | 2  | 3 | 439          |
| 7   |                  | x     | x     | Malá Roudka          | SW margin of the village, oligotrophic grassland                                                  | 49                                                   | 38 | 16 | 38            | 0  | 3 | 439          |
| 8   |                  |       | x     | Letovice             | 1 km SE of the railway-station, oak-hornbeam forest, rocky ground                                 | 49                                                   | 32 | 16 | 43            | 4  | 1 | 360          |
| 9   |                  | x     | x     | Letovice             | 0.8 km SE of the railway-station, mesic <i>Arrhenatherum</i> meadow                               | 49                                                   | 32 | 56 | 48            | 3  | 3 | 339          |
| 10  |                  | x     |       | Letovice             | 0.5 km SE of the railway-station, secondary <i>Robinia pseudacacia</i> plantation, rock-outcrop   | 49                                                   | 32 | 56 | 48            | 3  | 3 | 339          |
| 11  |                  |       | x     | Lesoňovice           | S margin of the village, the balk invaded by mesic scrub                                          | 49                                                   | 39 | 16 | 82            | 3  | 2 | 564          |
| 12  |                  | x     |       | Čebín                | N margin of the village, broad-leaved dry grassland on the slope                                  | 49                                                   | 18 | 56 | 89            | 4  | 9 | 350          |
| 13  |                  | x     |       | Čebín                | N margin of the village, thermophilous oak-hornbeam forest, invaded by <i>Pinus sylvestris</i>    | 49                                                   | 18 | 56 | 88            | 1  | 5 | 350          |
| 14  |                  | x     |       | Křtiny               | N margin of the village, oak-hornbeam forest, rock outcrops and rock-edges in the valley          | 49                                                   | 17 | 36 | 48            | 4  | 8 | 450          |
| 15  |                  | x*    |       | Račice               | the ravine forests round the castle, tree layer invaded by <i>Robinia pseudacacia</i>             | 49                                                   | 16 | 26 | 52            | 7  | 2 | 369          |
| 16  |                  | x     | x*    | Otaslavice           | secondary <i>Robinia pseudacacia</i> forest near the field margin, 1 km N of the village          | 49                                                   | 23 | 37 | 41            | 1  | 2 | 293          |
| 17  |                  | x     |       | Manerov              | oak-hornbeam forest, 0.75 km SSE of the village                                                   | 49                                                   | 39 | 7  | 20            | 0  | 0 | 307          |
| 18  |                  | x     |       | Malhotky             | Nature reservation Malhotky, narrow-leaved dry grasslands, invaded by <i>Robinia pseudoacacia</i> | 49                                                   | 85 | 7  | 36            | 2  | 6 | 250          |
| 19  |                  | x     |       | Malhotky             | Nature reservation Malhotky, scrub at the foot-hill, close to the road                            | 49                                                   | 85 | 7  | 36            | 2  | 6 | 250          |
| 20  |                  | x*    |       | Bošovice             | S margin of the village, broad-leaved dry grasslands invaded by <i>Robinia pseudacacia</i>        | 49                                                   | 25 | 60 | 55            | 2  | 5 | 600          |

|    |    |    |    |                              |                                                                                                                                     |        |        |        |        |        |        |     |
|----|----|----|----|------------------------------|-------------------------------------------------------------------------------------------------------------------------------------|--------|--------|--------|--------|--------|--------|-----|
| 21 |    | x* |    | Bošovice                     | S margin of the village, broad-leaved dry grasslands                                                                                | 4<br>9 | 2      | 4<br>4 | 1<br>6 | 5<br>0 | 2<br>5 | 600 |
| 22 |    | x* |    | Bošovice                     | S margin of the village, the orchard with mesic <i>Arrhenatherum</i> meadow                                                         | 4<br>9 | 2      | 4<br>3 | 1<br>6 | 5<br>0 | 2<br>5 | 600 |
| 23 | x* |    |    | Milovice                     | oak-hornbeam forest, 1.5 km ESE of the village                                                                                      | 4<br>8 | 5<br>0 | 4<br>6 | 1<br>6 | 4<br>2 | 4<br>7 | 175 |
| 24 | x  |    |    | Kyjov                        | 2.5 km N of the railway-station, oak-hornbeam forests invaded by <i>Robinia pseudacacia</i>                                         | 4<br>9 | 2      | 3<br>4 | 1<br>7 | 7<br>0 | 0      | 235 |
| 25 | x  | x  | x  | Bílá Lhota-Měník             | Nature reservation Třesín, margin of the mesic scrub, 1 km S of the village Měník                                                   | 4<br>9 | 4<br>2 | 1<br>9 | 1<br>6 | 5<br>9 | 2<br>6 | 300 |
| 26 |    |    | x  | Ústí nad Orlicí              | Nature park Tichá Orlice, Cakle valley, slope under the railway                                                                     | 4<br>9 | 5<br>8 | 2<br>0 | 1<br>6 | 2<br>3 | 3      | 326 |
| 27 |    |    | x  | Albrechtice                  | mesic scrub, near the diversion road number 43                                                                                      | 4<br>9 | 5<br>5 | 1<br>8 | 1<br>6 | 3<br>8 | 4<br>7 | 437 |
| 28 |    |    | x  | Vamberk                      | mesic scrub, SE slope opposite the railway-station                                                                                  | 5<br>0 | 7      | 1<br>2 | 1<br>6 | 1<br>6 | 5<br>5 | 321 |
| 29 |    | x  |    | Bílý Újezd                   | 1 km NW of the village, the field thicket                                                                                           | 5<br>0 | 1<br>4 | 4<br>6 | 1<br>6 | 1<br>3 | 6      | 322 |
| 30 |    |    | x  | Hlubočky                     | supporting stone wall of the slope above the road, N margin of the village                                                          | 4<br>9 | 3<br>8 | 4      | 1<br>7 | 2<br>4 | 3<br>3 | 343 |
| 31 |    |    | x  | Hlubočky                     | eutrophic mesic scrub, N margin of the village                                                                                      | 4<br>9 | 3<br>8 | 4      | 1<br>7 | 2<br>4 | 3<br>3 | 343 |
| 32 |    | x  | x  | Loučka u Lipníku n. Bečvou   | 1 km SE of the village, mesic scrub and abandoned orchard close to the road                                                         | 4<br>9 | 3<br>3 | 3<br>6 | 1<br>7 | 3<br>6 | 2      | 299 |
| 33 | x  | x  |    | Loučka u Lipníku n. Bečvou   | 0.9 km SE of the village margin, wet oak-hornbeam forest, alluvium of the brook                                                     | 4<br>9 | 3<br>3 | 3<br>7 | 1<br>7 | 3<br>6 | 1<br>0 | 300 |
| 34 | x  | x  |    | Opatovice                    | 2 km S of the village, mesic <i>Arrhenatherum</i> meadow, invaded by ruderal vegetation                                             | 4<br>9 | 2<br>9 | 5<br>7 | 1<br>4 | 4<br>5 | 5      | 350 |
| 35 |    |    | x  | Chomýž                       | S margin of the village, oak-hornbeam forest                                                                                        | 4<br>9 | 2<br>1 | 3<br>6 | 1<br>7 | 3<br>9 | 1<br>5 | 307 |
| 36 |    |    | x  | Zlín-Malenovice, část Karlov | S margin of the village, abandoned mesic <i>Arrhenatherum</i> meadow invaded by oak-hornbeam forest                                 | 4<br>9 | 1<br>1 | 4<br>2 | 1<br>7 | 3<br>6 | 1<br>6 | 285 |
| 37 |    | x  | x  | Biskupice                    | abandoned orchard with mesic scrub, 1 km NW of the village                                                                          | 4<br>9 | 5      | 3<br>1 | 1<br>7 | 4<br>2 | 5      | 241 |
| 38 |    |    | x  | Slavičín                     | 2.5 km W of the church in the village, ditch of the road                                                                            | 4<br>9 | 5      | 2<br>7 | 1<br>7 | 5<br>0 | 5<br>9 | 394 |
| 39 |    |    | x  | Rudimov u Slavičina          | mesic scrub along the road, 1 km SW of the village                                                                                  | 4<br>9 | 3      | 5<br>7 | 1<br>7 | 4<br>8 | 4<br>8 | 350 |
| 40 |    | x  |    | Vlčnov                       | abandoned orchard invaded by mesic scrub along the road to Hluk                                                                     | 4<br>9 | 0      | 1<br>9 | 1<br>7 | 3<br>4 | 2<br>4 | 247 |
| 41 |    |    | x  | Citov                        | hardwood alluvial forest on the village margin, close to road to Věrovany                                                           | 4<br>9 | 2<br>8 | 0      | 1<br>7 | 1<br>9 | 2<br>3 | 200 |
| 42 |    | x  | x* | Rataje                       | ditch with mesic scrub, close to road to Nětčice                                                                                    | 4<br>9 | 1<br>5 | 5<br>5 | 1<br>7 | 1<br>9 | 5<br>1 | 273 |
| 43 |    | x  | x  | Lísky u Křoměříže            | Nature reservation Oulehla, scrub                                                                                                   | 4<br>9 | 1<br>0 | 2<br>9 | 1<br>7 | 1<br>2 | 4<br>3 | 289 |
| 44 |    | x  | x  | Lísky u Křoměříže            | Nature reservation Oulehla, broad-leaved dry grasslands                                                                             | 4<br>9 | 1<br>0 | 2<br>9 | 1<br>7 | 1<br>2 | 4<br>3 | 289 |
| 45 | x  |    | x  | Syrovín                      | 1 km N of the village, mesic <i>Arrhenatherum</i> meadow invaded by mesic scrub, on the slope invaded by <i>Robinia pseudacacia</i> | 4<br>9 | 1      | 4<br>6 | 1<br>7 | 1<br>6 | 6      | 292 |
| 46 |    | x  |    | Neslovice                    | secondary <i>Robinia pseudacacia</i> forest, along the road to the village of Hlína, 0,5 km of the crossroad                        | 4<br>9 | 8      | 1<br>4 | 1<br>6 | 2<br>3 | 4<br>7 | 396 |
| 47 | x  |    | x* | Hostěradice                  | sand stone quarry between the village Hostěradice and Miroslav, invaded by                                                          | 4<br>8 | 5<br>6 | 4<br>7 | 1<br>6 | 1<br>6 | 5<br>4 | 288 |

|    |    |    |   |                         | secondary <i>Robinia pseudacacia</i> forest                                                                            |    |    |    |    |    |     |     |
|----|----|----|---|-------------------------|------------------------------------------------------------------------------------------------------------------------|----|----|----|----|----|-----|-----|
| 48 |    | x  |   | Hrušovany n. Jevišovkou | balk with oak forest invaded by <i>Robinia pseudacacia</i> along the road to the village of Drnholec                   | 48 | 49 | 58 | 16 | 25 | 7   | 190 |
| 49 |    | x  |   | Pravlov                 | secondary <i>Robinia pseudacacia</i> forest near the football pitch in the village                                     | 49 | 36 | 26 | 16 | 29 | 17  | 200 |
| 50 |    | x  | x | Nový Dvůr               | near the castle Veveří, along the road to the town of Veverská Bitýška                                                 | 49 | 15 | 26 | 16 | 27 | 16  | 260 |
| 51 |    |    | x | Potštát                 | 2.5 km NW of the village, the margin of the field near the road                                                        | 49 | 38 | 56 | 17 | 38 | 17  | 567 |
| 52 |    | x* | x | Odry                    | 3 km SE of the village, the margin of oak-hornbeam forest                                                              | 49 | 38 | 97 | 15 | 15 | 15  | 324 |
| 53 |    |    | x | Kujavy                  | 0.5 km N of the village, oak-hornbeam forest along the road to the village of Pustějov                                 | 49 | 43 | 27 | 17 | 57 | 40  | 291 |
| 54 |    | x  |   | Hradec n. Moravicí      | eutrophic mesic scrub, 0.5 km E of the church in the town                                                              | 49 | 52 | 16 | 17 | 53 | 1   | 357 |
| 55 |    |    | x | Darkovičky              | 1.5 km S of the village, open sand grassland near the bunker                                                           | 49 | 56 | 08 | 18 | 16 | 56  | 250 |
| 56 |    |    | x | Koblov                  | Nature reservation Landek, the margin of the foot-way with mesic <i>Arrhenatherum</i> meadow                           | 49 | 52 | 14 | 18 | 16 | 49  | 203 |
| 57 | x  | x  |   | Albrechtice u Havířova  | 0.5 km S of the village, oak-hornbeam forest                                                                           | 49 | 46 | 35 | 18 | 16 | 56  | 301 |
| 58 |    | x  | x | Kamenec u Opavy         | 0.5 km N of the cowshed in the village, small hill between fields with secondary <i>Robinia pseudacacia</i> plantation | 49 | 58 | 55 | 17 | 46 | 33  | 325 |
| 59 |    | x  |   | Cvilín                  | 1 km S of the village, the forest road margin in acidophilous oak-hornbeam forest                                      | 50 | 47 | 17 | 17 | 43 | 26  | 350 |
| 60 |    | x  |   | Třemešná                | steep slopes above the village invaded by <i>Fraxinus excelsior</i>                                                    | 50 | 12 | 38 | 17 | 34 | 29  | 400 |
| 61 | x  |    |   | Třemešná                | 0.7 km N of the church in the village, acidophilous oak-hornbeam forest                                                | 50 | 12 | 38 | 17 | 34 | 29  | 400 |
| 62 | x  |    |   | Holčovice               | S margin of the village Jelení, the slope under the road with mesic <i>Arrhenatherum</i> meadow invaded by trees       | 50 | 77 | 47 | 17 | 28 | 45  | 610 |
| 63 | x* |    |   | Široká Niva             | 0.5 km SE of the village, the slope under the road with mesic <i>Arrhenatherum</i> meadow                              | 50 | 37 | 67 | 18 | 28 | 43  | 450 |
| 64 |    |    | x | Dvorce u Mor. Berouna   | N margin of the village, broad-leaved forest along the road to the village of Bílčice                                  | 49 | 50 | 21 | 17 | 32 | 56  | 557 |
| 65 | x  | x  |   | Šternberk               | 0.5 km NW of the church in the village Lipina, pasture                                                                 | 49 | 44 | 45 | 17 | 19 | 10  | 498 |
| 66 |    | x  |   | Libčany                 | 2 km WNW of the village, acidophilous oak-hornbeam forest                                                              | 50 | 12 | 05 | 10 | 40 | 8   | 268 |
| 67 | x* | x  |   | Libníkovice             | oak-hornbeam forest with ruderal vegetation near the farm building                                                     | 50 | 14 | 56 | 15 | 59 | 37  | 273 |
| 68 |    | x  | x | Choceň                  | Nature reservation Peliny, sliding chalk slopes in oak-hornbeam forest                                                 | 50 | 03 | 16 | 13 | 18 | 48  | 300 |
| 69 |    | x  | x | Borohrádek              | 0.5 km NW of the village, oak-hornbeam forest                                                                          | 50 | 67 | 16 | 16 | 64 | 279 |     |
| 70 | x  |    |   | Cerekvice n. Loučnou    | 1.5 km NW of the village, mesic scrub between the field and orchard                                                    | 49 | 54 | 17 | 16 | 13 | 59  | 301 |
| 71 | x  |    |   | Číštěves                | oak-hornbeam forest behind the farm building in the village                                                            | 50 | 17 | 37 | 15 | 43 | 0   | 287 |
| 72 |    | x  |   | Velký Vřeštov           | broad-leaved dry grassland behind the collective farm building in the village                                          | 50 | 21 | 40 | 15 | 45 | 0   | 276 |
| 73 |    | x  |   | Malé Poříčí             | mesic scrub on the slope above the road to the town of Hronov                                                          | 50 | 27 | 12 | 16 | 11 | 0   | 383 |
| 74 |    | x  |   | Kuks                    | 1 km E of the Kuks castle, broad-leaved dry                                                                            | 5  | 24 | 11 | 55 | 5  | 299 |     |

|    |   |   |    |                              |                                                                                                                                  |        |        |        |        |        |        |     |
|----|---|---|----|------------------------------|----------------------------------------------------------------------------------------------------------------------------------|--------|--------|--------|--------|--------|--------|-----|
|    |   |   |    | grassland                    |                                                                                                                                  | 0      | 3      | 5      | 5      | 4      |        |     |
| 75 |   | x | x  | Petrovice                    | 0,4 km S of the railway-station in the village, abandoned orchard with mesic <i>Arrhenatherum</i> meadow                         | 5<br>0 | 3<br>0 | 4<br>0 | 1<br>6 | 1<br>2 | 5<br>2 | 400 |
| 76 |   | x |    | Brusnice                     | small forest between fields 1 km N of the village                                                                                | 5<br>0 | 2<br>9 | 1<br>1 | 1<br>5 | 5<br>3 | 5<br>1 | 500 |
| 77 |   | x |    | Březová                      | mesic <i>Arrhenatherum</i> meadow with ruderal vegetation above the road between the village of Březová and Bohdašín             | 5<br>0 | 3<br>5 | 5<br>9 | 1<br>6 | 1<br>2 | 5<br>3 | 499 |
| 78 |   | x |    | Štramberk                    | 0.5 km N of the castle Štramberk, the margin of ash forest                                                                       | 4<br>9 | 3<br>5 | 4<br>1 | 1<br>8 | 6      | 5<br>9 | 474 |
| 79 | x |   |    | Staříč                       | 1 km SW of the village, the margin of the forest invaded by mesic scrub                                                          | 4<br>9 | 4<br>0 | 4<br>1 | 1<br>8 | 1<br>6 | 1<br>4 | 343 |
| 80 | x |   |    | Nový Hrozenkov-Planiska      | 0.9 km E of the railway-station in the village, the orchard with mesic <i>Arrhenatherum</i> meadow                               | 4<br>9 | 2<br>0 | 3<br>0 | 1<br>8 | 1<br>3 | 5      | 475 |
| 81 | x |   |    | Huslenky-Zděchov             | 2 km E of the village, grove between mesic <i>Arrhenatherum</i> meadows                                                          | 4<br>9 | 1<br>5 | 3<br>0 | 1<br>8 | 6      | 1<br>5 | 628 |
| 82 |   | x |    | Oslavany                     | secondary <i>Robinia pseudacacia</i> forest along the road between the village of Oslavany and Nová Ves                          | 4<br>9 | 6      | 5<br>9 | 1<br>6 | 1<br>9 | 2<br>2 | 274 |
| 83 | x |   |    | Dobelice                     | secondary <i>Robinia pseudacacia</i> forest along the road to the village of Dukovany                                            | 4<br>9 | 1      | 5      | 1<br>6 | 1<br>6 | 1<br>5 | 246 |
| 84 |   | x |    | Hrádek u Znojma              | secondary <i>Robinia pseudacacia</i> forest, on the left bank of the Dyje river near the road to the village of Jaroslavice      | 4<br>8 | 4<br>6 | 1<br>3 | 1<br>6 | 1<br>5 | 2<br>5 | 188 |
| 85 |   | x |    | Rozkoš u Jevišovic           | mesic scrub on the field margin near the road to the village of the Jevišovice                                                   | 4<br>9 | 1      | 2<br>4 | 1<br>5 | 5<br>8 | 2<br>4 | 401 |
| 86 |   | x |    | Vevčice                      | 2 km N of the village, the margin of the field above the Jevišovka river                                                         | 4<br>8 | 5<br>8 | 3<br>8 | 1<br>6 | 2      | 8      | 279 |
| 87 |   | x |    | Pastviny                     | 2 km S of the village, road ditch                                                                                                | 5<br>0 | 6      | 2<br>5 | 1<br>6 | 3<br>3 | 3<br>8 | 549 |
| 88 | x |   |    | Vsetín                       | 3 km NE of the castle, near the U Kovářů settlement, oak-hornbeam forest                                                         | 4<br>9 | 2<br>1 | 2<br>5 | 1<br>8 | 1<br>5 | 4<br>2 | 638 |
| 89 |   |   | x  | Ratiboř                      | slope above the football pitch in the village, abandoned pasture invaded by ash-maple forest                                     | 4<br>9 | 2<br>2 | 8<br>7 | 1<br>5 | 5<br>5 | 0      | 366 |
| 90 |   |   | x  | Troubelice                   | 1.5 km W of the church in the village, hollow way with mesic <i>Arrhenatherum</i> meadow                                         | 4<br>9 | 4<br>9 | 1<br>3 | 1<br>7 | 3      | 2<br>5 | 315 |
| 91 |   |   | x  | Troubelice                   | 1.6 km W of the church in the village, hollow way                                                                                | 4<br>9 | 4<br>9 | 1<br>3 | 1<br>7 | 3      | 2<br>5 | 315 |
| 92 |   |   | x  | Rovensko u Zábřehu n. Moravě | 0.4 km S of the church in the village, oligotrophic grassland along the field                                                    | 4<br>9 | 5<br>4 | 3<br>4 | 1<br>6 | 5<br>2 | 3<br>6 | 305 |
| 93 |   | x | x  | Komňátka                     | 0.5 km N of the village, shaded mesic <i>Arrhenatherum</i> meadow above the road                                                 | 5<br>0 | 0      | 4<br>9 | 1<br>6 | 5<br>3 | 4<br>2 | 379 |
| 94 | x | x | x  | Hanušovice                   | 0.1 km N of the petrol station in the town, mesic meadow above the road                                                          | 5<br>0 | 4      | 5<br>5 | 1<br>6 | 5<br>6 | 9      | 488 |
| 95 |   | x |    | Branná                       | rock-outcrops under the church in the village                                                                                    | 5<br>0 | 9      | 4      | 1<br>7 | 0      | 4<br>0 | 595 |
| 96 | x | x |    | Branná                       | near the church in the village, steep slopes with rock-outcrops, mesic <i>Arrhenatherum</i> meadow invaded by ruderal vegetation | 5<br>0 | 9      | 7      | 1<br>7 | 0      | 4<br>2 | 595 |
| 97 |   | x | x* | Branná                       | rock-face along the main road in the village                                                                                     | 5<br>0 | 9      | 7      | 1<br>7 | 0      | 3<br>7 | 595 |
| 98 |   | x |    | Valchov u Boskovic           | 1 km E of the church in the village, cliffs with oak-hornbeam forest                                                             | 4<br>9 | 2<br>7 | 5<br>8 | 1<br>6 | 4<br>3 | 3<br>8 | 530 |
| 99 |   | x |    | Valchov u Boskovic           | 0.9 km E of the church in the village, oligotrophic grasslands and the margin of mesic                                           | 4<br>9 | 2<br>7 | 5<br>7 | 1<br>6 | 4<br>3 | 3<br>7 | 517 |

|     |   |    |    |                         | scrub                                                                                                                     |        |        |        |        |        |        |     |
|-----|---|----|----|-------------------------|---------------------------------------------------------------------------------------------------------------------------|--------|--------|--------|--------|--------|--------|-----|
| 100 |   | x  | x  | Malé Hradisko           | SE part of the village, the margin of the acidophilous oak-hornbeam forest                                                | 4<br>9 | 2<br>9 | 3<br>0 | 1<br>6 | 5<br>2 | 4<br>9 | 549 |
| 101 |   | x  |    | Malý Beranov            | the margin of the field above the Jihlava river opposite the factory in the village                                       | 4<br>9 | 2<br>3 | 3<br>7 | 1<br>5 | 3<br>8 | 5      | 477 |
| 102 |   | x  |    | Popice u Jihlavy        | 0.5 km NW of the church in the village, the balk between fields with broadleaved trees invaded by ruderal vegetation      | 4<br>9 | 2<br>1 | 1<br>2 | 1<br>5 | 3<br>2 | 1<br>6 | 625 |
| 103 |   | x  |    | Petrkov u Zachotína     | on the W village margin, the balk between the field and meadow with oak-hornbeam forest invaded by ruderal vegetation     | 4<br>9 | 2<br>7 | 1<br>8 | 1<br>5 | 2<br>1 | 2<br>6 | 552 |
| 104 | x |    |    | Vsetín, Jasenice        | U Valů settlement, the balk between pastures with broadleaved trees                                                       | 4<br>9 | 2<br>1 | 6<br>2 | 1<br>8 | 3      | 1<br>4 | 550 |
| 105 |   | x  |    | Květná                  | 0.7 km SW of the church in the village, broad-leaved grassland invaded by mesic scrub                                     | 4<br>9 | 4<br>4 | 3<br>2 | 1<br>6 | 2<br>0 | 2<br>5 | 551 |
| 106 |   | x* | x  | Oldříš                  | 0.5 km SE of the railway-station Oldříš, balk near the arable field                                                       | 4<br>9 | 4<br>3 | 5<br>4 | 1<br>6 | 1<br>1 | 1<br>5 | 599 |
| 107 |   | x  |    | Malochyně               | 0.5 km NE of the railway-station Malochyně, broad-leaved dry grassland invaded by mesic scrub                             | 4<br>9 | 4<br>2 | 2<br>9 | 1<br>5 | 4<br>4 | 2<br>3 | 508 |
| 108 |   | x  |    | Maleč                   | 1.5 km SE of the centre of the village, balks between meadows, and oak-hornbeam forest                                    | 4<br>9 | 4<br>5 | 3<br>8 | 1<br>5 | 4<br>1 | 1<br>6 | 420 |
| 109 |   | x  | x  | Třemošnice              | 1 km S of the town, oak-hornbeam forest on rock blocks along the road to the village of Běstvina                          | 4<br>9 | 5<br>1 | 4<br>2 | 1<br>5 | 3<br>5 | 9      | 350 |
| 110 | x |    |    | Nové Dvory u Kutné Hory | 2 km N of the village, alluvial forest along the former brook                                                             | 4<br>9 | 5<br>8 | 5<br>6 | 1<br>5 | 1<br>9 | 9      | 207 |
| 111 |   | x  |    | Zbraslav u Prahy        | Závist hill - 0.05 km of the chapel, oak-hornbeam forest and thermophilous oak forest                                     | 4<br>9 | 5<br>8 | 2      | 1<br>4 | 2<br>4 | 9      | 195 |
| 112 |   | x  |    | Dobřichovice            | 1 km NE of the village, the NE margin of oak-hornbeam forest and acidophilous oak forest                                  | 4<br>9 | 5<br>6 | 3<br>2 | 1<br>4 | 1<br>7 | 3<br>0 | 242 |
| 113 |   | x  |    | Tobolka                 | 1 km SE of the village - Tobolský hill, oak-hornbeam forest invaded by <i>Pinus nigra</i>                                 | 4<br>9 | 5<br>5 | 3<br>4 | 1<br>4 | 5      | 2<br>2 | 449 |
| 114 |   | x  |    | Tetín                   | Nature reservation Tetínské skály, broad-leaved dry grassland above the Berounka river                                    | 4<br>9 | 5<br>6 | 5<br>9 | 1<br>4 | 6      | 2<br>0 | 217 |
| 115 |   | x  | x* | Srbsko                  | on the S village margin, the Koda valley, wet oak-hornbeam forest                                                         | 4<br>9 | 5<br>5 | 5<br>7 | 1<br>4 | 7      | 3<br>1 | 331 |
| 116 | x | x  | x  | Srbsko                  | 1 km N of the village along the Berounka river, chalk rocks invaded by mesic scrub                                        | 4<br>9 | 5<br>6 | 3<br>8 | 1<br>4 | 7      | 5<br>3 | 210 |
| 117 |   | x  |    | Bítov (u Berouna)       | 2 km W of the village, the margin of secondary pine forest                                                                | 4<br>9 | 5<br>5 | 4<br>8 | 1<br>4 | 3      | 2      | 263 |
| 118 |   |    | x  | Počáply                 | 1.5 km E of the village, secondary <i>Robinia pseudacacia</i> forest near the road to the village of Trubín               | 4<br>9 | 5<br>6 | 3<br>1 | 1<br>4 |        | 2<br>9 | 296 |
| 119 |   | x  | x  | Zbiroh                  | 0.3 km N of the village, oak-hornbeam forest along the Zbirohžský brook                                                   | 4<br>9 | 5<br>2 | 2<br>3 | 1<br>3 | 4<br>5 | 2<br>6 | 400 |
| 120 |   | x  |    | Kalínova Ves            | near the bridge across the Berounka river in the village, the slope with <i>Robinia pseudacacia</i> trees and mesic scrub | 4<br>9 | 5<br>7 | 4<br>2 | 1<br>3 | 4<br>1 | 5<br>0 | 270 |
| 121 |   | x  |    | Pitkovičky              | 0.5 km behind the bridge in the village, acidophilous oak-hornbeam forest                                                 | 5<br>0 | 1      | 2<br>8 | 1<br>4 | 3<br>4 | 2<br>2 | 259 |
| 122 |   | x  |    | Vinoř                   | the W margin of the village, acidophilous hornbeam forest degraded by planting of the evergreens                          | 5<br>0 | 8      | 4<br>9 | 1<br>4 | 3<br>4 | 1<br>0 | 248 |
| 123 | x |    |    | Libiš                   | Nature reservation Černínovsko, alluvial forest                                                                           | 5<br>0 | 1<br>3 | 5<br>4 | 1<br>4 | 3<br>0 | 1<br>6 | 200 |

|     |   |   |   |                      |                                                                                                                |        |        |        |        |        |        |     |
|-----|---|---|---|----------------------|----------------------------------------------------------------------------------------------------------------|--------|--------|--------|--------|--------|--------|-----|
| 124 |   | x |   | Košátky              | near the railway-station in the village, oak-hornbeam forest invaded by <i>Pinus nigra</i>                     | 5<br>0 | 1<br>9 | 0<br>4 | 1<br>4 | 4<br>0 | 2<br>9 | 212 |
| 125 |   | x |   | Bříství              | 1 km E of the village - 0.3 km of the motorway, the balk invaded by mesic scrub                                | 5<br>0 | 7<br>5 | 5<br>4 | 1<br>1 | 5<br>1 | 1<br>1 | 201 |
| 126 |   | x |   | Přistoupim           | 0.5 km N of the village under the transmitter, abandoned orchard with mesic <i>Arrhenatherum</i> meadow        | 5<br>0 | 3<br>8 | 4<br>4 | 1<br>2 | 5<br>5 | 5<br>2 | 237 |
| 127 |   | x |   | Klučov               | Klučovský hill, oligotrophic grasslands and pastures                                                           | 5<br>0 | 5<br>2 | 5<br>4 | 1<br>4 | 5<br>4 | 3<br>2 | 209 |
| 128 | x |   |   | Klučov               | Klučovský hill, oak-hornbeam forest                                                                            | 5<br>0 | 5<br>3 | 5<br>4 | 1<br>4 | 5<br>4 | 3<br>3 | 209 |
| 129 |   |   | x | Čichov               | the NE margin of the village, oligotrophic grassland, 0.4 km behind the brook                                  | 4<br>9 | 1<br>7 | 1<br>3 | 1<br>5 | 4<br>6 | 1<br>1 | 450 |
| 130 |   | x | x | Jestřebí u Stonařova | 2 km W of the village, ditch and balk                                                                          | 4<br>9 | 1<br>7 | 1<br>8 | 1<br>5 | 3<br>6 | 5<br>9 | 625 |
| 131 |   | x | x | Přestavky u Čerčan   | the S slope of the Vepří hill above the farm, balks between grasslands with sparse mesic scrub                 | 4<br>9 | 5<br>1 | 2<br>1 | 1<br>4 | 4<br>4 | 2<br>7 | 447 |
| 132 |   | x | x | Dobříčkov            | 1 km NE of the village, near the grade crossing, mesic scrub                                                   | 4<br>9 | 4<br>5 | 1<br>6 | 1<br>4 | 4<br>6 | 8<br>6 | 462 |
| 133 |   | x |   | Jankov (u Benešova)  | 0.5 km S of the village, abandoned orchard with <i>Arrhenatherum</i> meadow                                    | 4<br>9 | 3<br>9 | 2<br>9 | 1<br>4 | 4<br>3 | 6<br>3 | 550 |
| 134 | x |   |   | Libice n. Cidlinou   | Nature reservation Libický luh - the N margin of the reservation, alluvial forest near the motorway            | 5<br>0 | 6<br>8 | 5<br>5 | 1<br>0 | 1<br>1 | 1<br>1 | 182 |
| 135 | x | x |   | Veltruby             | Nature reservation Veltrubský luh, wet oak-hornbeam forest                                                     | 5<br>0 | 4<br>3 | 3<br>5 | 1<br>0 | 1<br>2 | 1<br>2 | 183 |
| 136 |   | x |   | Ratiboř              | the balk invaded by mesic scrub above the Skokan pond                                                          | 4<br>9 | 5<br>8 | 5<br>8 | 1<br>5 | 1<br>0 | 1<br>8 | 273 |
| 137 |   | x |   | Nová Lhota           | 0.3 km W of the church, former alley with mesic scrub, field margin                                            | 4<br>9 | 5<br>3 | 0<br>5 | 1<br>7 | 1<br>7 | 4<br>7 | 340 |
| 138 |   |   | x | Kácov                | the E margin of the village, vegetation of spring therophytes and succulents near arable field                 | 4<br>9 | 4<br>6 | 3<br>1 | 1<br>5 | 2<br>6 | 1<br>6 | 378 |
| 139 | x |   |   | Zruč nad Sázavou     | on the SW village margin, rocks above the Sázava river bushes by mesic scrub                                   | 4<br>9 | 4<br>5 | 2<br>5 | 1<br>5 | 5<br>8 | 1<br>8 | 379 |
| 140 |   | x |   | Ledeč n. Sázavou     | chalk rocks under the castle, invaded by secondary <i>Robinia pseudacacia</i> forest                           | 4<br>9 | 4<br>1 | 4<br>9 | 1<br>5 | 1<br>6 | 5<br>9 | 399 |
| 141 |   | x |   | Moravský Krumlov     | on the N town margin, 0.7 km of the statue of St. Florián, oak forest with mesic scrub spots                   | 4<br>9 | 2<br>7 | 5<br>6 | 1<br>9 | 1<br>1 | 1<br>1 | 250 |
| 142 |   | x |   | Mohelno              | Nature reservation Mohelenská hadcová step, mesic scrub on the foot of the slope invaded by ruderal vegetation | 4<br>9 | 6<br>0 | 2<br>0 | 1<br>6 | 1<br>1 | 2<br>4 | 300 |
| 143 |   | x |   | Smrk u Třebíče       | 0.8 m NW of the village, the slope with secondary <i>Robinia pseudacacia</i> forest and field margin           | 4<br>9 | 1<br>3 | 5<br>5 | 1<br>5 | 5<br>9 | 4<br>9 | 469 |
| 144 |   | x |   | Miletín              | Nature reservation Miletínská rezervace, the margin of oak-hornbeam forest                                     | 5<br>0 | 2<br>4 | 6<br>5 | 1<br>9 | 3<br>2 | 5<br>2 | 334 |
| 145 |   |   | x | Jičín                | Veliš hill, abandoned orchard with broad-leaved dry grassland vegetation, and mesic scrub                      | 5<br>0 | 2<br>7 | 1<br>0 | 1<br>5 | 2<br>2 | 2<br>7 | 300 |
| 146 |   | x |   | Újezd p. Troskami    | 1.3 km E of the village, field margin along broad-leaved dry grassland                                         | 5<br>0 | 3<br>0 | 2<br>6 | 1<br>5 | 1<br>6 | 3<br>6 | 302 |
| 147 |   | x |   | Trosky               | Trosky castle - rocks and steep slopes, oak-hornbeam forest and basalt rock spots                              | 5<br>0 | 3<br>0 | 5<br>7 | 1<br>5 | 1<br>3 | 5<br>9 | 399 |
| 148 | x | x |   | Sedliště u Libáně    | the E margin of the village, wet oak-hornbeam forest along the brook                                           | 5<br>0 | 2<br>3 | 3<br>8 | 1<br>5 | 1<br>3 | 3<br>2 | 262 |
| 149 | x | x |   | Žehuň                | Kozí hůra hill, oak-hornbeam forest                                                                            | 5<br>0 | 7<br>5 | 3<br>5 | 1<br>7 | 1<br>7 | 2<br>7 | 228 |
| 150 | x | x |   | Hradčany             | Nature reservation Báň, oak-hornbeam forest                                                                    | 5<br>0 | 9<br>0 | 3<br>5 | 1<br>6 | 1<br>7 | 4<br>7 | 257 |

|     |   |   |   |                   |                                                                                                                                                               |        |        |        |        |        |        |     |
|-----|---|---|---|-------------------|---------------------------------------------------------------------------------------------------------------------------------------------------------------|--------|--------|--------|--------|--------|--------|-----|
| 151 | x | x |   | Studce u Mcel     | on the W village margin near the church, oak forest and scrub                                                                                                 | 5<br>0 | 1<br>7 | 3<br>8 | 1<br>5 | 2<br>4 | 4<br>2 | 245 |
| 152 |   | x | x | Mladá Boleslav    | Nature reservation Radouč, chalk steep slopes above the Jizera river, scrub along the forest road                                                             | 5<br>0 | 2<br>5 | 5<br>8 | 1<br>4 | 5<br>3 | 5<br>2 | 220 |
| 153 |   | x |   | Bělá p. Bezdězem  | Velký Bezděz hill, rocks and rock-outcrops under the top of the hill with ravine forest, talus cones and steep phonolite slopes with forest fringe vegetation | 5<br>0 | 3<br>2 | 1<br>9 | 1<br>4 | 4<br>3 | 1<br>2 | 525 |
| 154 |   | x |   | Korce             | Korecký hill, abandoned pastures invaded by <i>Arrhenatherum elatius</i> , <i>Festuca rubra</i>                                                               | 5<br>0 | 3<br>2 | 6<br>4 | 1<br>4 | 3<br>6 | 1<br>9 | 358 |
| 155 |   |   | x | Mošnice           | road number 269 - diversion to the village of Mošnice, the balk with <i>Robinia pseudoacacia</i> trees along the road                                         | 5<br>0 | 3<br>1 | 4<br>6 | 1<br>4 | 2<br>6 | 5<br>8 | 265 |
| 156 |   | x |   | Pokratice         | Nature reservation Bílé stráně, mesic scrub, the upper part of the slope near the field                                                                       | 5<br>0 | 3<br>3 | 2<br>4 | 1<br>4 | 7<br>4 | 5<br>4 | 307 |
| 157 |   | x |   | Pokratice         | on the N village margin, the hollow way                                                                                                                       | 5<br>0 | 3<br>3 | 1<br>0 | 1<br>4 | 7<br>6 | 3<br>6 | 289 |
| 158 |   | x |   | Třebušín u Úštěka | on the N village margin, ravine forest                                                                                                                        | 5<br>0 | 3<br>6 | 1<br>6 | 1<br>4 | 1<br>2 | 3<br>4 | 499 |
| 159 |   | x |   | Malé Březno       | 0.5 km E of the village, rock-outcrops with narrow-leaved dry grassland above the valley of the brook                                                         | 5<br>0 | 4<br>0 | 1<br>6 | 1<br>4 | 1<br>0 | 3<br>6 | 199 |
| 160 |   | x |   | Ústí n. L.        | Střekov castle, steep rock-outcrop under the castle                                                                                                           | 5<br>0 | 3<br>8 | 2<br>2 | 1<br>4 | 3<br>4 | 2<br>2 | 150 |
| 161 |   | x |   | Hostomice         | Husův vrch hill, narrow-leaved dry grassland invaded by secondary <i>Robinia pseudoacacia</i> forest                                                          | 5<br>0 | 3<br>5 | 2<br>0 | 1<br>3 | 4<br>8 | 4<br>9 | 190 |
| 162 |   | x |   | Hostomice         | Husův vrch hill, narrow-leaved dry grassland with basalt debris                                                                                               | 5<br>0 | 3<br>5 | 1<br>9 | 1<br>3 | 4<br>8 | 4<br>8 | 190 |
| 163 | x | x |   | Korozluky         | Nature reservation Jánský vrch, narrow-leaved dry grassland with sparse <i>Fraxinus excelsior</i> trees                                                       | 5<br>0 | 2<br>8 | 5<br>8 | 1<br>3 | 4<br>3 | 2<br>9 | 250 |
| 164 |   | x |   | Hrádek u Rané     | 1 km E of the village, narrow-leaved dry grassland invaded by shrubs near the field                                                                           | 5<br>0 | 2<br>4 | 3<br>6 | 1<br>3 | 4<br>4 | 3<br>9 | 234 |
| 165 |   | x |   | Chožov            | Chožovský vrch hill, secondary <i>Robinia pseudoacacia</i> forest on the slope                                                                                | 5<br>0 | 2<br>4 | 9<br>3 | 1<br>1 | 5<br>9 | 2<br>9 | 453 |
| 166 |   | x |   | Křesín            | Rohatec hill, eutrophic mesic scrub under the railway near the field                                                                                          | 5<br>0 | 2<br>3 | 4<br>4 | 1<br>3 | 5<br>9 | 5<br>3 | 199 |
| 167 |   | x |   | Klenceč           | Nature reservation Klenceč, the margin of the forest invaded by <i>Robinia pseudoacacia</i> under the reservation                                             | 5<br>0 | 2<br>3 | 2<br>0 | 1<br>4 | 1<br>5 | 2<br>3 | 204 |
| 168 |   | x |   | Kralupy n. Vl.    | 0.5 km NE of the church in the town, the margin of mesic <i>Arrhenatherum</i> meadow and mesic scrub on rock-outcrop                                          | 5<br>0 | 1<br>4 | 3<br>1 | 1<br>4 | 1<br>8 | 1<br>9 | 171 |
| 169 |   | x |   | Číčovice          | Číčovický Kamýk hill, narrow-leaved dry grassland invaded by mesic scrub, the balk under the field                                                            | 5<br>0 | 8<br>7 | 3<br>4 | 1<br>4 | 1<br>4 | 5<br>6 | 302 |
| 170 |   | x | x | Srbeč u Mšec      | on the S village margin, mesic scrub and field margin                                                                                                         | 5<br>0 | 1<br>3 | 2<br>3 | 1<br>3 | 5<br>2 | 4<br>0 | 400 |
| 171 |   | x |   | Milý              | Nature reservation Milská stráň, sliding chalk rubble, broad-leaved dry grassland invaded by scrub                                                            | 5<br>0 | 1<br>4 | 9<br>3 | 1<br>1 | 5<br>8 | 5<br>8 | 449 |
| 172 | x |   | x | Děkov             | Děkovská stráň hill, broad-leaved dry grassland invaded by scrub                                                                                              | 5<br>0 | 1<br>0 | 9<br>3 | 1<br>3 | 3<br>3 | 3<br>4 | 400 |
| 173 |   | x | x | Hředle            | 1.5 km N of the church in the village, the balk between fields and abandoned orchard invaded by mesic scrub                                                   | 5<br>0 | 1<br>1 | 5<br>3 | 1<br>3 | 4<br>4 | 3<br>7 | 476 |

|     |   |   |   |                    |                                                                                                                                                            |        |        |        |        |        |        |     |
|-----|---|---|---|--------------------|------------------------------------------------------------------------------------------------------------------------------------------------------------|--------|--------|--------|--------|--------|--------|-----|
| 174 |   |   | x | Velký Rybník       | on the NE village margin, the balk between fields, grassland invaded by mesic scrub                                                                        | 4<br>9 | 2<br>9 | 2<br>5 | 1<br>5 | 1<br>8 | 4<br>1 | 497 |
| 175 |   | x |   | Velký Rybník       | on the NE village margin, the balk between fields, grassland invaded by mesic scrub                                                                        | 4<br>9 | 2<br>9 | 2<br>5 | 1<br>5 | 1<br>8 | 4<br>0 | 497 |
| 176 |   | x | x | Pelhřimov          | on the N village margin, above the brook near the road to town of Humpolec, oak-hornbeam forest near the field                                             | 4<br>9 | 2<br>6 | 2<br>0 | 1<br>5 | 1<br>3 | 3<br>4 | 499 |
| 177 |   | x |   | Vysoká Lhota       | 0.5 km N of the church in the village, the balk along the road                                                                                             | 4<br>9 | 2<br>5 | 1<br>4 | 1<br>5 | 2<br>0 | 3<br>0 | 599 |
| 178 | x |   |   | Ústějov            | on the NW village margin, mesic scrub along acidophilous oak-hornbeam forest and mesic <i>Arrhenatherum</i> meadow                                         | 4<br>9 | 3<br>0 | 6<br>0 | 1<br>4 | 4<br>9 | 1<br>2 | 514 |
| 179 |   |   | x | Sezimovo Ústí      | Nature reservation Luna, steep slopes with rock-outcrops, oligotrophic grasslands, under the slope mesic <i>Arrhenatherum</i> meadow along the brook       | 4<br>9 | 2<br>3 | 1<br>2 | 1<br>4 | 4<br>2 | 1<br>6 | 406 |
| 180 |   |   | x | Tábor              | Granátová skála hill under the Lužnice river under the church in the town, eutrophic ravine forest                                                         | 4<br>9 | 2<br>4 | 3<br>9 | 1<br>4 | 3<br>9 | 2<br>5 | 402 |
| 181 |   | x |   | Stádlec            | rock-outcrop in the village and acidophilous oak-hornbeam forest near the village                                                                          | 4<br>9 | 2<br>2 | 8<br>4 | 1<br>4 | 3<br>0 | 5<br>5 | 369 |
| 182 |   | x |   | Jesenice           | 0.5 km S of the village, rocky hill between fields, secondary <i>Robinia pseudacacia</i> forest                                                            | 4<br>9 | 3<br>6 | 1<br>8 | 1<br>4 | 2<br>8 | 4<br>5 | 367 |
| 183 |   |   | x | Nová Ves pod Pleší | 1 km SSE of the village, acidophilous hornbeam forest in the mosaic with mesic scrub                                                                       | 4<br>9 | 4<br>9 | 2<br>2 | 1<br>4 | 1<br>6 | 5<br>7 | 408 |
| 184 |   | x |   | Cholín             | 0.75 km NW of the village, on the left bank of Vltava river, steep slopes with xerophilous oak-hornbeam forest and narrow-leaved rock steppe               | 4<br>9 | 4<br>3 | 2<br>0 | 1<br>4 | 1<br>9 | 3<br>0 | 263 |
| 185 |   |   | x | Běštín             | E margin of the village, the top of the hill above the village, abandoned orchard invaded by shrubs and the orchard with mesic <i>Arrhenatherum</i> meadow | 4<br>9 | 4<br>8 | 3<br>1 | 1<br>4 | 1<br>0 | 2<br>8 | 384 |
| 186 | x |   | x | Lazsko             | 1 km S of the diversion to the village of Ostrov, small hills between fields with sparse stands of mesic shrubs                                            | 4<br>9 | 3<br>7 | 3<br>0 | 1<br>4 | 0<br>0 | 3<br>3 | 528 |
| 187 |   | x |   | Počáply            | on the S village margin, rock-outcrops above the stream, narrow-leaved dry grassland invaded by scrub                                                      | 4<br>9 | 3<br>2 | 9<br>0 | 1<br>3 | 5<br>8 | 4<br>9 | 469 |
| 188 |   | x |   | Myštice            | 0.2 km NW of the village, the balk along the road with eutrophic mesic <i>Arrhenatherum</i> meadow                                                         | 4<br>9 | 2<br>7 | 2<br>4 | 1<br>3 | 5<br>7 | 5<br>5 | 474 |
| 189 |   | x |   | Podhůří            | on the S village margin, oak-beach forest                                                                                                                  | 4<br>9 | 2<br>8 | 1<br>0 | 1<br>3 | 3<br>9 | 5<br>9 | 470 |
| 190 |   |   | x | Vrčeň              | on the SE village margin, the stony balk above the road                                                                                                    | 4<br>9 | 3<br>0 | 3<br>6 | 1<br>3 | 3<br>7 | 3<br>2 | 450 |
| 191 |   | x |   | Mítov              | 1 km W of the village, the margin of the quarry, steep rocky slopes with oak-hornbeam and ravine forest                                                    | 4<br>9 | 3<br>5 | 3<br>1 | 1<br>3 | 3<br>9 | 2<br>0 | 492 |
| 192 |   | x |   | Mešno              | 0.5 km W of the village, the balk of the field road, abandoned orchard                                                                                     | 4<br>9 | 3<br>9 | 1<br>8 | 1<br>3 | 3<br>6 | 5<br>6 | 473 |
| 193 |   |   | x | Dalešice           | 0.5 km NW of the village, rocky-outcrops invaded by <i>Robinia pseudacacia</i>                                                                             | 4<br>9 | 4<br>7 | 2<br>5 | 1<br>4 | 2<br>8 | 3<br>7 | 388 |
| 194 |   | x | x | Skoupý             | Nature monument Kozinec, narrow-leaved dry grassland                                                                                                       | 4<br>9 | 3<br>4 | 3<br>9 | 1<br>4 | 2<br>0 | 2<br>3 | 500 |
| 195 |   |   | x | Písek              | Václavské skály hill, steep slopes above the Otava river, secondary <i>Robinia pseudacacia</i> forest, the top of the hill with oak-hornbeam forest        | 4<br>9 | 1<br>8 | 3<br>8 | 1<br>4 | 7<br>0 | 1<br>2 | 405 |



|     |   |   |   |                      |                                                                                                                                                                     |        |        |        |        |        |        |     |
|-----|---|---|---|----------------------|---------------------------------------------------------------------------------------------------------------------------------------------------------------------|--------|--------|--------|--------|--------|--------|-----|
| 196 |   | x |   | Čičenice             | on the NNW village margin, supporting stone wall between the field and meadow connecting with mesic scrub                                                           | 4<br>9 | 9      | 2<br>3 | 1<br>4 | 1<br>3 | 4<br>6 | 417 |
| 197 |   |   | x | Bechyně              | on the E village margin, near the bridge across the Lužnice river, at the foot of rock-outcrop, oak-hornbeam forest and secondary <i>Robinia pseudacacia</i> forest | 4<br>9 | 1<br>7 | 4<br>5 | 1<br>4 | 2<br>8 | 3<br>8 | 393 |
| 198 |   |   | x | Soběslav             | on the W village margin, along the road to village of Vesec                                                                                                         | 4<br>9 | 1<br>5 | 1<br>7 | 1<br>4 | 4<br>1 | 5<br>0 | 411 |
| 199 |   | x |   | Mukoděly             | on the W village margin, mesic scrub along oak-hornbeam forest                                                                                                      | 5<br>0 | 8<br>0 | 5<br>0 | 1<br>3 | 2<br>4 | 2<br>0 | 334 |
| 200 |   |   | x | Dvorce               | on the NW village margin, broad-leaved dry grasslands                                                                                                               | 5<br>0 | 1<br>2 | 2<br>4 | 1<br>3 | 1<br>9 | 2<br>9 | 452 |
| 201 |   | x |   | Úhošťany             | Nature reservation Úhošť, top of the hill, sparse oak-hornbeam forest and steppe                                                                                    | 5<br>0 | 2<br>1 | 3<br>8 | 1<br>3 | 1<br>4 | 4<br>4 | 529 |
| 202 |   |   | x | Úhošťany             | on the SE village margin, the field balk                                                                                                                            | 5<br>0 | 2<br>1 | 1<br>5 | 1<br>3 | 1<br>4 | 5<br>4 | 428 |
| 203 | x |   |   | Hasištejn            | S margin of the Hasištejn castle, rock-outcrops and rocks under the castle and dry oak forest                                                                       | 5<br>0 | 2<br>6 | 4<br>2 | 1<br>3 | 1<br>5 | 2<br>6 | 515 |
| 204 |   | x |   | Perštejn             | near the Perštejn castle, the slope along the road with oligotrophic grassland invaded by mesic scrub                                                               | 5<br>0 | 2<br>3 | 1<br>4 | 1<br>3 | 6<br>9 | 1<br>9 | 439 |
| 205 |   | x |   | Maroltov             | 1 km SE of the village, ditch along the road invaded by mesic scrub and ruderal vegetation                                                                          | 5<br>0 | 2<br>0 | 4<br>0 | 1<br>2 | 5<br>9 | 1<br>9 | 489 |
| 206 |   | x |   | Andělská Hora        | hill with the ruin of Andělská hora castle, xeric vegetation on rocks                                                                                               | 5<br>0 | 1<br>2 | 1<br>9 | 1<br>2 | 5<br>7 | 5<br>2 | 611 |
| 207 |   |   | x | Protivec             | 100 m NW of the railway-station, mesic <i>Arrhenatherum</i> meadow in the abandoned orchard                                                                         | 5<br>0 | 5<br>4 | 2<br>3 | 1<br>2 | 1<br>4 | 2<br>4 | 474 |
| 208 |   | x | x | Bečov n. Teplou      | opposite the railway-station, ravine forest                                                                                                                         | 5<br>0 | 5<br>4 | 4<br>2 | 1<br>9 | 4<br>9 | 4<br>9 | 510 |
| 209 |   | x |   | Loket                | N of the railway-station, the ruin of the castle wall and rock outcrop in oak-hornbeam forest                                                                       | 5<br>0 | 1<br>4 | 2<br>2 | 1<br>5 | 4<br>9 | 2<br>9 | 449 |
| 210 |   |   | x | Ostroh               | under the castle, secondary mixed forest                                                                                                                            | 5<br>0 | 8<br>0 | 0<br>2 | 1<br>6 | 1<br>7 | 5<br>7 | 499 |
| 211 |   | x | x | Kynšperk n. Ohří     | on the N town margin, steep slope above the road, oak-hornbeam forest                                                                                               | 5<br>0 | 7<br>2 | 3<br>2 | 1<br>2 | 3<br>1 | 5<br>1 | 427 |
| 212 |   | x | x | Krsy                 | 0.8 km SE of the village along the road, mesic <i>Arrhenatherum</i> meadow invaded by ruderal vegetation                                                            | 4<br>9 | 5<br>5 | 4<br>9 | 1<br>3 | 3<br>5 | 5<br>3 | 630 |
| 213 |   | x |   | Koterov              | under the Koterovská skála hill, balk along the road                                                                                                                | 4<br>9 | 4<br>2 | 5<br>3 | 1<br>3 | 2<br>6 | 1<br>6 | 332 |
| 214 |   | x | x | Radčice              | Čertova skála hill, slopes invaded by secondary <i>Robinia pseudacacia</i> forest                                                                                   | 4<br>9 | 4<br>5 | 2<br>7 | 1<br>3 | 2<br>0 | 3<br>1 | 324 |
| 215 |   |   | x | Dolní Bělá           | Berg hill, mesic grassland and field margin                                                                                                                         | 4<br>9 | 5<br>3 | 5<br>6 | 1<br>3 | 1<br>6 | 2<br>0 | 461 |
| 216 |   |   | x | Plasy                | S margin of the village Horní Hradiště, the hollow way - mesic <i>Arrhenatherum</i> meadow                                                                          | 4<br>9 | 5<br>7 | 6<br>3 | 1<br>2 | 2<br>6 | 3<br>6 | 462 |
| 217 |   |   | x | Manětín              | 0.5 km N of the church in the village, abandoned orchard and mesic <i>Arrhenatherum</i> meadow invaded by mesic scrub                                               | 4<br>9 | 5<br>9 | 4<br>4 | 1<br>3 | 1<br>4 | 2<br>4 | 471 |
| 218 |   |   | x | Konstantino vy Lázně | 2 km W of the village, ditch with mesic <i>Arrhenatherum</i> meadow invaded by ruderal vegetation and mesic scrub along the road                                    | 4<br>9 | 5<br>2 | 5<br>2 | 1<br>2 | 5<br>7 | 2<br>5 | 517 |
| 219 |   | x |   | Josefova Huť         | on the N village margin, steep slopes with thermophilous oak-hornbeam forest, open rocky places with broad-leaved dry grassland                                     | 4<br>9 | 4<br>9 | 2<br>8 | 1<br>2 | 4<br>7 | 0<br>7 | 450 |
| 220 |   | x |   | Labuť                | 0.5 km of the church in the village, the hill between pastures                                                                                                      | 4<br>9 | 4<br>2 | 3<br>2 | 1<br>2 | 3<br>9 | 4<br>9 | 541 |

|     |   |   |   |                           |                                                                                                                              |        |        |        |        |        |        |     |
|-----|---|---|---|---------------------------|------------------------------------------------------------------------------------------------------------------------------|--------|--------|--------|--------|--------|--------|-----|
| 221 |   | x |   | Holubeč                   | on the S village margin, slopes above the road, abandoned orchard                                                            | 4<br>9 | 3<br>5 | 5<br>9 | 1<br>2 | 4<br>6 | 5<br>4 | 489 |
| 222 |   | x |   | Tasnovice                 | 0.5 km E of the village, oligotrophic grassland and the margin of mesic scrub                                                | 4<br>9 | 3<br>3 | 5<br>8 | 1<br>2 | 4<br>9 | 3<br>7 | 399 |
| 223 |   | x |   | Bukovec                   | ca 1 km E of the village, meadow invaded by ruderal vegetation, near arable field                                            | 4<br>9 | 3<br>5 | 1<br>3 | 1<br>3 | 0<br>3 | 1<br>9 | 425 |
| 224 |   | x |   | Přibylův                  | on the SW village margin, sliding chalk slopes with broad-leaved dry grassland                                               | 4<br>9 | 5<br>1 | 3<br>5 | 1<br>5 | 5<br>8 | 5<br>4 | 356 |
| 225 | x | x | x | Bitov                     | 0.5 km W of the village, rock-outcrops above the Dyje river, narrow-leaved dry grassland                                     | 4<br>8 | 5<br>6 | 3<br>2 | 1<br>5 | 4<br>3 | 2<br>2 | 350 |
| 226 |   | x |   | Bačkovice                 | on the E village margin, fragments of narrow-leaved dry grassland between the field and road                                 | 4<br>8 | 5<br>8 | 1<br>4 | 1<br>5 | 3<br>5 | 4<br>5 | 435 |
| 227 |   |   | x | Toužín                    | abandoned quarry near the road to town of Dačice, edges with thermophilous vegetation                                        | 4<br>9 | 4<br>1 | 3<br>5 | 1<br>5 | 2<br>5 | 1<br>0 | 461 |
| 228 |   |   | x | Hostětice                 | 1 km E of the village, the margin of broad-leaved forest near the field                                                      | 4<br>9 | 1<br>1 | 2<br>9 | 1<br>5 | 2<br>5 | 1<br>5 | 564 |
| 229 |   | x |   | Řásná                     | 1 km S of the village, field thicket between the field and road                                                              | 4<br>9 | 1<br>2 | 5<br>1 | 1<br>5 | 2<br>3 | 3<br>0 | 644 |
| 230 |   | x | x | Veselá                    | 0.5 km WNW of the village, stony balks                                                                                       | 4<br>9 | 1<br>9 | 8<br>5 | 1<br>3 | 1<br>2 | 1<br>2 | 644 |
| 231 |   | x |   | Kamenný Malíkov           | N margin of the village, 0.2 km behind the cowshed, the field margin                                                         | 4<br>9 | 1<br>2 | 5<br>8 | 1<br>5 | 7<br>2 | 2<br>5 | 524 |
| 232 |   |   | x | Plasná                    | 1.5 km N of the village, the hill between the field                                                                          | 4<br>9 | 1<br>1 | 2<br>9 | 1<br>4 | 5<br>3 | 1<br>7 | 462 |
| 233 |   |   | x | Sviny                     | the cross road of roads to Veselý nad Lužnicí and Kundratice, the wall ruin of chapel                                        | 4<br>9 | 1<br>1 | 0<br>4 | 1<br>8 | 3<br>6 | 4<br>6 | 421 |
| 234 |   | x | x | Hluboká n. Vltavou        | steep slopes under the castle in the park, debris and small rocks with sparse mesic shrubs                                   | 4<br>9 | 3<br>4 | 0<br>6 | 1<br>4 | 2<br>6 | 3<br>1 | 373 |
| 235 |   |   | x | Velechvín                 | 1 km SE of the village, balk with oligotrophic grassland and field margin                                                    | 4<br>9 | 2<br>6 | 4<br>4 | 1<br>5 | 3<br>3 | 1<br>3 | 499 |
| 236 |   |   | x | Domanín                   | on the S village margin, the field thicket with sparse oak trees                                                             | 4<br>8 | 5<br>8 | 7<br>4 | 1<br>4 | 4<br>4 | 1<br>8 | 453 |
| 237 | x |   |   | Morávka - Úspolka         | near the bus stop in the village, ditch of the road                                                                          | 4<br>9 | 3<br>3 | 4<br>3 | 1<br>8 | 3<br>3 | 3<br>3 | 550 |
| 238 | x |   |   | Velké Karlovice - Tisňavy | 0.4 km NE of the bus stop in the village, mesic meadow                                                                       | 4<br>9 | 2<br>1 | 1<br>9 | 1<br>8 | 1<br>9 | 4<br>9 | 600 |
| 239 |   | x |   | Čachnov                   | 0.5 km NW of the Porostliny settlement, abandoned plum alley                                                                 | 4<br>9 | 4<br>5 | 5<br>6 | 1<br>6 | 3<br>6 | 6<br>6 | 545 |
| 240 |   |   | x | Vimperk                   | rocks under the castle in the town                                                                                           | 4<br>9 | 3<br>2 | 1<br>3 | 1<br>6 | 4<br>0 | 4<br>0 | 681 |
| 241 |   | x |   | Víchovská Lhota           | on the SE village margin, mesic scrub and balk along the road                                                                | 5<br>0 | 3<br>8 | 3<br>7 | 1<br>5 | 2<br>9 | 1<br>7 | 514 |
| 242 |   |   | x | Splazy                    | Nature reservation Betlém (Betlémské skály), the margin of mesic scrub                                                       | 5<br>0 | 3<br>6 | 4<br>4 | 1<br>5 | 1<br>1 | 4<br>9 | 330 |
| 243 |   |   | x | Splazy                    | Nature reservation Betlém (Betlémské skály), oak-hornbeam forest                                                             | 5<br>0 | 3<br>6 | 4<br>4 | 1<br>5 | 1<br>1 | 4<br>9 | 330 |
| 244 |   |   | x | Rakousy                   | N margin of the village, mesic scrub                                                                                         | 5<br>0 | 3<br>7 | 1<br>6 | 1<br>5 | 1<br>0 | 5<br>6 | 320 |
| 245 |   |   | x | Rakousy                   | N margin of the village, rocks in beech forest                                                                               | 5<br>0 | 3<br>7 | 1<br>6 | 1<br>5 | 1<br>0 | 5<br>5 | 320 |
| 246 |   | x | x | Semily                    | near the Řeky city district, oak-hornbeam forest                                                                             | 5<br>0 | 3<br>6 | 3<br>4 | 1<br>5 | 1<br>9 | 5<br>6 | 330 |
| 247 |   | x |   | Chrastava                 | on the SE village margin, abandoned orchard and field margin invaded by broad-leaved trees                                   | 5<br>0 | 4<br>8 | 2<br>6 | 1<br>4 | 5<br>8 | 4<br>0 | 300 |
| 248 |   |   | x | Lázně Libverda            | on the N village margin near the crossroad to town of Nové Město pod Smrkem, the balk between fields with broad-leaved trees | 5<br>0 | 5<br>3 | 2<br>2 | 1<br>5 | 1<br>2 | 4<br>9 | 470 |

|     |   |   |   |                    |                                                                                                              |        |        |        |        |        |          |     |
|-----|---|---|---|--------------------|--------------------------------------------------------------------------------------------------------------|--------|--------|--------|--------|--------|----------|-----|
| 249 |   | x |   | Kunratice          | 0.5 km S of the village, the field thicked with sparse broadleaved trees                                     | 5<br>0 | 5<br>4 | 3<br>9 | 1<br>5 | 1<br>1 | 5<br>340 |     |
| 250 |   |   | x | Brtníky            | 0.2 km SW of the church in the village, abandoned orchard                                                    | 5<br>0 | 5<br>6 | 5<br>3 | 1<br>4 | 2<br>6 | 1<br>9   | 410 |
| 251 |   | x | x | Robeč              | 1 km SW of the village, mesic scrub along the road under abandoned meadow                                    | 5<br>0 | 4<br>0 | 8<br>0 | 1<br>4 | 2<br>9 | 4<br>3   | 380 |
| 252 |   | x |   | Provodín           | Nature reservation Provodínské kameny, on the top of the basalt rock Lysá skála                              | 5<br>0 | 3<br>7 | 4<br>8 | 1<br>4 | 3<br>6 | 3<br>1   | 419 |
| 253 |   |   | x | Provodín           | ditch along the road between the villages of Provodín and Srní                                               | 5<br>0 | 3<br>7 | 2<br>8 | 1<br>4 | 3<br>5 | 5<br>6   | 250 |
| 254 |   | x | x | Mimoň              | on the S town margin near the petrol station, secondary <i>Robinia pseudacacia</i> forest along the road     | 5<br>0 | 4<br>0 | 4<br>0 | 1<br>4 | 4<br>3 | 3<br>9   | 300 |
| 255 |   |   | x | Žibřidice          | 1 km W of the church in the village, the balk with rocky ground along the road                               | 5<br>0 | 4<br>4 | 1<br>9 | 1<br>4 | 5<br>2 | 8<br>330 |     |
| 256 | x | x |   | Lohenice           | on the W village margin, the margin of the bank along the Labe river                                         | 5<br>0 | 2<br>1 | 4<br>5 | 1<br>5 | 3<br>5 | 2<br>9   | 200 |
| 257 | x | x |   | Dvakačovice        | on the SE village margin, oak-hornbeam forest and mesic <i>Arrhenatherum</i> meadow at the road balk         | 4<br>9 | 5<br>8 | 3<br>9 | 1<br>5 | 5<br>3 | 5<br>6   | 250 |
| 258 |   | x |   | Litomyšl           | on the E town margin along the road to village of Strakov, oak-hornbeam forest and the balk along the forest | 4<br>9 | 5<br>2 | 1<br>0 | 1<br>6 | 2<br>0 | 1<br>0   | 360 |
| 259 |   | x | x | Dolní Újezd        | 1 km NE of the village, oak-hornbeam forest                                                                  | 4<br>9 | 3<br>3 | 1<br>4 | 1<br>7 | 3<br>2 | 5<br>9   | 340 |
| 260 | x |   | x | Suchov             | 0.5 km S of the Trnovský Mlýn settlement, the alluvium of the brook, ash-alder forest                        | 4<br>8 | 5<br>3 | 1<br>7 | 1<br>7 | 3<br>4 | 3<br>2   | 390 |
| 261 | x | x |   | Suchov             | Nature reservation Jazevčí, broad-leaved dry grassland and dry scrub                                         | 4<br>8 | 5<br>2 | 1<br>9 | 1<br>7 | 3<br>3 | 2<br>8   | 350 |
| 262 |   | x |   | Kněždub            | 1.5 km E of the church in the village, ruderal scrub along the field road between fields                     | 4<br>8 | 5<br>3 | 1<br>7 | 1<br>7 | 2<br>5 | 8<br>215 |     |
| 263 |   | x |   | Točnick            | small rocks under Žebrák castle                                                                              | 4<br>9 | 5<br>3 | 2<br>1 | 1<br>3 | 5<br>3 | 1<br>4   | 320 |
| 264 |   | x |   | Prakšice           | Prakšický Mlýn settlement, abandoned orchard invaded by ruderal vegetation                                   | 4<br>9 | 3<br>0 | 5<br>7 | 1<br>6 | 3<br>6 | 4<br>6   | 270 |
| 265 | x |   |   | Vsetín, Jasenice   | Zbrojovka settlement, abandoned pastures and scrub                                                           | 4<br>9 | 2<br>1 | 6<br>2 | 1<br>8 | 3<br>4 | 1<br>4   | 550 |
| 266 |   | x |   | Landštejn          | under the Landštejn castle, broad-leaved forest                                                              | 4<br>9 | 1<br>4 | 3<br>5 | 1<br>4 | 1<br>4 | 0<br>620 |     |
| 267 |   |   | x | Stráž n. Nežárkou  | 1 km E of the town near the crossroad to the village of Příbraz, the field thicket with sparse oak-trees     | 4<br>9 | 3<br>5 | 4<br>4 | 1<br>5 | 5<br>5 | 4<br>452 |     |
| 268 |   |   | x | Keblany            | on the S village margin, oligotrophic grassland along the road near the field                                | 4<br>8 | 4<br>8 | 4<br>3 | 1<br>4 | 3<br>5 | 4<br>0   | 540 |
| 269 |   | x | x | Český Krumlov      | on the N town margin, eutrophic mesic scrub along the road to the village of Vyšný                           | 4<br>8 | 4<br>9 | 2<br>0 | 1<br>4 | 1<br>8 | 4<br>4   | 550 |
| 270 |   | x |   | Český Krumlov      | Nature reservation Vyšenské kopce, oak-hornbeam forest and the margin of the forest, steppe                  | 4<br>8 | 4<br>9 | 2<br>1 | 1<br>4 | 1<br>8 | 2<br>570 |     |
| 271 |   | x |   | Kokořov            | 0.5 km SW of the village, mesic scrub                                                                        | 4<br>9 | 2<br>9 | 4<br>3 | 1<br>3 | 2<br>9 | 5<br>5   | 470 |
| 272 |   | x | x | Balkovy            | on the W village margin, ash-alder forest in the brook alluvium                                              | 4<br>9 | 2<br>6 | 4<br>1 | 1<br>3 | 1<br>2 | 4<br>1   | 400 |
| 273 |   | x |   | Slatina u Klatov   | on the E village margin, mesic scrub under oak-hornbeam forest along the road                                | 4<br>9 | 2<br>6 | 4<br>8 | 1<br>3 | 1<br>1 | 2<br>8   | 470 |
| 274 |   | x | x | Horšovský Týn      | the park castle in the town, sparse oak forest above the small pond                                          | 4<br>9 | 3<br>1 | 4<br>9 | 1<br>2 | 5<br>6 | 2<br>6   | 380 |
| 275 |   |   | x | Hluboká u Domažlic | 0.5 km NE of the village, abandoned pastures under the forest                                                | 4<br>9 | 2<br>2 | 2<br>7 | 1<br>3 | 4<br>1 | 4<br>1   | 550 |

|     |    |   |   |                  |                                                                                                             |        |        |        |        |        |        |     |
|-----|----|---|---|------------------|-------------------------------------------------------------------------------------------------------------|--------|--------|--------|--------|--------|--------|-----|
| 276 |    | x | x | Strážov          | on the N village margin, the field thicket with sparse mesic shrubs                                         | 4<br>9 | 1<br>8 | 2<br>6 | 1<br>3 | 1<br>4 | 3<br>6 | 470 |
| 277 |    |   | x | Srbice           | 1 km N of the village, the field thicket between the pasture and field                                      | 4<br>9 | 2<br>1 | 2<br>6 | 1<br>3 | 2<br>0 | 1<br>7 | 450 |
| 278 |    | x |   | Velhartice       | on the SE village margin, small rocks in pine forest under the castle                                       | 4<br>9 | 1<br>5 | 5<br>2 | 1<br>3 | 2<br>3 | 4<br>8 | 640 |
| 279 |    | x |   | Červené Dvorce   | on the W village margin, abandoned pasture invaded by mesic scrub and margin of the arable field            | 4<br>9 | 1<br>2 | 4<br>8 | 1<br>3 | 2<br>9 | 5<br>8 | 510 |
| 280 |    |   | x | Sušice           | on the NE village margin near the petrol station, broad-leaved dry grassland in the lime-pit                | 4<br>9 | 1<br>2 | 5<br>2 | 1<br>3 | 2<br>9 | 5<br>8 | 500 |
| 281 |    | x | x | Malé Hydčice     | 1 km SW of the village, limestone hills and small rocks under the road to village of Bojanovice             | 4<br>9 | 1<br>7 | 5<br>3 | 1<br>3 | 3<br>9 | 6      | 440 |
| 282 |    | x |   | Střela           | on the E village margin, abandoned orchard overgrown with mesic shrubs above the village                    | 4<br>9 | 1<br>6 | 4      | 1<br>3 | 5<br>1 | 1<br>5 | 410 |
| 283 |    | x | x | Domanice         | on the S village margin, broad-leaved dry grassland and mesic scrub margin                                  | 4<br>9 | 1<br>7 | 5<br>0 | 1<br>3 | 5<br>5 | 2<br>7 | 450 |
| 284 |    | x |   | Husinec          | 1.5 km NNW of the village, the balk invaded by eutrophic mesic scrub                                        | 4<br>9 | 4      | 0      | 1<br>3 | 5<br>8 | 3<br>1 | 505 |
| 285 |    | x |   | Smědeč           | 0.5 km NE of the village, oak-hornbeam forest between pastures                                              | 4<br>8 | 5<br>6 | 2<br>4 | 1<br>4 | 8<br>4 | 4<br>6 | 695 |
| 286 |    |   | x | Zlatá Koruna     | near the cloister Zlatá Koruna, mesic meadow in the garden and rocks above the Vltava river                 | 4<br>8 | 5<br>1 | 1<br>1 | 1<br>4 | 2<br>2 | 1<br>9 | 350 |
| 287 | x  |   |   | Lanžhot          | 4 km S of the village, alluvial forest                                                                      | 4<br>8 | 4<br>1 | 4<br>4 | 1<br>6 | 5<br>7 | 1<br>6 | 153 |
| 288 | x  |   |   | Vsetín           | U Maršálů settlement, balk with mesic scrub and the margin of the beech forest                              | 4<br>9 | 1<br>9 | 5<br>4 | 1<br>8 | 3<br>5 | 1<br>5 | 620 |
| 289 |    |   | x | Trutnov-Poříčí   | slope near the railway-station, oak-hornbeam forest                                                         | 5<br>0 | 3<br>4 | 4<br>7 | 1<br>5 | 5<br>8 | 1      | 415 |
| 290 |    | x | x | Rudník           | on the SE village margin, the field road between meadows                                                    | 5<br>0 | 3<br>4 | 5<br>3 | 1<br>5 | 4<br>4 | 2<br>5 | 420 |
| 291 |    | x |   | Horní Lánov      | slope above the lime-pit, meadow                                                                            | 5<br>0 | 3<br>8 | 5<br>5 | 1<br>4 | 1<br>0 | 1<br>0 | 540 |
| 292 |    | x |   | Studnice         | on the N village margin, the balk invaded by shrubs                                                         | 4<br>9 | 4<br>4 | 3<br>4 | 1<br>5 | 5<br>2 | 2      | 650 |
| 293 |    | x |   | Blížkov          | on the S village margin, the slope under the road, mesic <i>Arrhenatherum</i> meadow                        | 4<br>9 | 2<br>4 | 6<br>5 | 1<br>5 | 5<br>4 | 3<br>0 | 520 |
| 294 |    |   | x | Heřmanov         | 1.5 km E of the village, the balk between the field and meadow along the road                               | 4<br>9 | 2<br>2 | 4<br>5 | 1<br>6 | 1<br>2 | 7      | 575 |
| 295 |    | x |   | Mladeč           | Nature reservation Třesín, beech forest                                                                     | 4<br>9 | 4<br>2 | 3<br>3 | 1<br>6 | 5<br>9 | 4<br>9 | 340 |
| 296 |    |   | x | Mikulov          | Nature reservation Turoid, oak-hornbeam forest                                                              | 4<br>8 | 4<br>9 | 1<br>8 | 1<br>6 | 3<br>8 | 1<br>8 | 360 |
| 297 |    | x |   | Vsetín           | Zádilský valley, pasture                                                                                    | 4<br>9 | 2<br>0 | 4<br>3 | 1<br>8 | 1      | 9      | 490 |
| 298 | x  |   |   | Pražmo           | 0.5 km W of the village, the balk along the road                                                            | 4<br>9 | 3<br>6 | 3<br>5 | 1<br>8 | 2<br>8 | 5<br>9 | 430 |
| 299 |    | x |   | Seč              | under the Oheb castle, gneiss rocks                                                                         | 4<br>9 | 5<br>0 | 6      | 1<br>5 | 3<br>9 | 5      | 475 |
| 300 | x  |   |   | Dolní Dunajovice | on the W village margin, ditches along the field road                                                       | 4<br>8 | 5<br>1 | 2<br>5 | 1<br>6 | 3<br>4 | 1<br>0 | 195 |
| 301 | x  |   |   | Voletice         | broad-leaved dry grassland invaded by mesic scrub and oak-hornbeam forest                                   | 4<br>9 | 5<br>4 | 2<br>7 | 1<br>6 | 2      | 9      | 340 |
| 302 |    | x |   | Střemošice       | Nature reservation Střemošická stráž, broad-leaved dry grassland                                            | 4<br>9 | 5<br>3 | 1<br>7 | 1<br>6 | 4      | 4<br>7 | 380 |
| 303 | x* |   | x | Slatinice        | 1 km W of the church in the village, secondary <i>Robinia pseudacacia</i> forest in the valley of the brook | 4<br>9 | 3<br>3 | 3<br>8 | 1<br>7 | 5      | 1<br>9 | 270 |

|     |   |   |   |                           |                                                                                          |        |        |        |        |        |        |     |
|-----|---|---|---|---------------------------|------------------------------------------------------------------------------------------|--------|--------|--------|--------|--------|--------|-----|
| 304 | x |   |   | Ochoz u Brna - Horní Mlýn | ravine forest in the valley of Říčka brook                                               | 4<br>9 | 1<br>4 | 3<br>8 | 1<br>6 | 4<br>4 | 9      | 360 |
| 305 |   | x |   | Slaný                     | Slánská hora hill, oak-hornbeam forest on the upper rocky part of the hill               | 5<br>0 | 1<br>3 | 5<br>1 | 1<br>4 | 5<br>3 | 9      | 325 |
| 306 | x |   |   | Klentnice                 | 1 km N of the village, oak-hornbeam forest                                               | 4<br>8 | 5<br>1 | 2<br>4 | 1<br>6 | 3<br>8 | 3<br>8 | 275 |
| 307 |   | x |   | Štítná nad Vláří          | on the N village margin, mesic scrub along the railway                                   | 4<br>9 | 4      | 4<br>9 | 1<br>7 | 5<br>7 | 4<br>5 | 330 |
| 308 |   | x |   | Vojtěchov - Skalka        | 1 km S of the village, limestone rocks on the top of the hill, oak-hornbeam forest       | 4<br>9 | 3<br>8 | 3<br>3 | 1<br>6 | 5<br>4 | 9      | 460 |
| 309 | x |   |   | Ludmírov                  | 1 km E of the village, limestone small rocks, broad-leaved dry grassland                 | 4<br>9 | 3<br>7 | 5<br>4 | 1<br>6 | 5<br>2 | 2<br>1 | 500 |
| 310 |   | x | x | Kostelec na Hané          | 2 km SE of the railway-station in the village, the alluvial forest along the Romže brook | 4<br>9 | 2<br>9 | 3<br>6 | 1<br>7 | 4<br>2 | 2<br>1 | 235 |
| 311 |   | x |   | Hamry                     | on the S village margin, upper part of the slope with acidophilous oak forest            | 4<br>9 | 2<br>7 | 4<br>3 | 1<br>6 | 5<br>8 | 4<br>7 | 330 |
| 312 |   | x |   | Štítná nad Vláří          | ash-alder forest (spring area) in the middle of secondary spruce forest                  | 4<br>9 | 4      | 5<br>1 | 1<br>7 | 5<br>8 | 5<br>3 | 330 |
| 313 | x |   |   | Vlachovice                | oak-hornbeam forest invaded by the ash, alder and ruderal vegetation near the field      | 4<br>9 | 7      | 1<br>2 | 1<br>7 | 5<br>6 | 2<br>6 | 400 |
| 314 |   |   | x | Horka nad Moravou         | 1 km NW of the village, alluvial forest along the Mlýnský potok stream                   | 4<br>9 | 3<br>8 | 4<br>8 | 1<br>7 | 1<br>2 | 3<br>7 | 230 |
| 315 |   | x |   | Malešov u Kutné Hory      | 1.7 km NNE of the village, rocks above the Velký rybník pond                             | 4<br>9 | 5<br>5 | 4<br>3 | 1<br>5 | 1<br>4 | 1<br>7 | 320 |
| 316 |   | x |   | Rabštejn                  | rocks, ravine forest and meadow under the Rabštejn castle                                | 4<br>9 | 5<br>6 | 5<br>0 | 1<br>7 | 5<br>8 | 8      | 790 |
| 317 |   | x |   | Klentnice                 | balk near the village                                                                    | 4<br>8 | 5<br>0 | 4<br>6 | 1<br>6 | 3<br>8 | 2<br>6 | 350 |
| 318 |   | x |   | Teplice nad Bečvou        | Nature reservation Hůrka, the right bank of Bečva river, oak forest                      | 4<br>9 | 3<br>1 | 5<br>5 | 1<br>7 | 4<br>4 | 5<br>9 | 300 |
| 319 |   |   | x | Nová Hradečná             | near the railway-station, the balk invaded by ruderal vegetation                         | 4<br>9 | 5<br>0 | 9<br>7 | 1<br>7 | 4<br>2 | 1<br>2 | 280 |
| 320 | x |   |   | Pitín                     | 0.2 km NW of the church in the village, balk near the railway                            | 4<br>9 | 2<br>5 | 2<br>7 | 1<br>0 | 5<br>2 | 5<br>2 | 360 |
| 321 |   | x |   | Březina                   | Nature reservation Špraněk, limestone rocks opposite the Zkamenělý zámek castle          | 4<br>9 | 4<br>0 | 2<br>6 | 1<br>6 | 5<br>4 | 1<br>3 | 470 |
| 322 | x |   |   | Bruntál                   | Venušina sopka hill, the top of the slope, the edge of the forest and surrounding field  | 4<br>9 | 5<br>7 | 3<br>7 | 1<br>7 | 2<br>8 | 1<br>3 | 640 |
| 323 |   | x |   | Krnov                     | ruins of the Cvilín castle, in the moat                                                  | 5<br>0 | 5<br>5 | 4<br>7 | 1<br>4 | 4<br>2 | 4<br>8 | 420 |
| 324 |   | x |   | Sloup                     | on the SE village margin, limestone rocks                                                | 4<br>9 | 2<br>4 | 4<br>1 | 1<br>6 | 4<br>4 | 3<br>3 | 500 |
| 325 |   |   | x | Točnick                   | on the N village margin, mesic scrub along the field                                     | 4<br>9 | 5<br>3 | 1<br>8 | 1<br>3 | 5<br>3 | 4      | 400 |
